# Supplementary material for: Transitions from Single- to Multi-Locus Processes during Speciation with Gene Flow
Source: PubMed Central journal article supplement (PMC6027428; doi:10.3390/genes9060274), 2018-05-24
Supplement: genes-09-00274-s001.pdf [file genes-09-00274-s001.pdf]

## Supplementary Materials

### Transitions from single- to multi-locus processes during speciation

Schilling MP, Mullen SP, Kronforst M, Safran RJ, Nosil P, Feder JL, Gompert Z, and  
Flaxman SM

2018

Table S1: Summary statistics for the 450 included simulation runs.

| set                            | A        | B        | C        | D        | E        | F        | G        | H        | I        |
|--------------------------------|----------|----------|----------|----------|----------|----------|----------|----------|----------|
| s                              | 0.005    | 0.01     | 0.02     | 0.005    | 0.01     | 0.02     | 0.02     | 0.02     | 0.02     |
| m                              | 0.01     | 0.01     | 0.01     | 0.1      | 0.1      | 0.1      | 0.00002  | 0.0001   | 0.0002   |
| nRuns                          | 50       | 50       | 50       | 50       | 50       | 50       | 50       | 50       | 50       |
| mean number of variable loci   | 2386.02  | 1077.2   | 554.48   | 197.02   | 1202.46  | 626.3    | 555.82   | 490.68   | 470.9    |
| sd number of variable loci     | 56.67    | 36.94    | 23.93    | 13.59    | 32.47    | 22.02    | 89.0     | 41.54    | 24.92    |
| mean total generations elapsed | 619540   | 155160   | 39979.68 | 1500000  | 333960   | 63230    | 38560    | 31940    | 31200    |
| sd total generations elapsed   | 24938.46 | 8524.54  | 2970.84  | 0        | 32459.68 | 5090.22  | 7775.31  | 3893.53  | 2555.51  |
| RI reached                     | 1        | 1        | 1        | 0        | 1        | 1        | 1        | 1        | 1        |
| mean total mutations introd.   | 6195409  | 1551609  | 399805.8 | 15000000 | 3339609  | 632309   | 385609   | 319409   | 312009   |
| sd total mutations introd.     | 249384.6 | 85245.38 | 29708.39 | 0        | 324596.8 | 50902.17 | 77753.14 | 38935.32 | 25555.06 |

Table S2: Summary for nonlinear least squares fit of Barton's coupling coefficient ( $\theta$ ) and average allele frequency differences between demes for selected and neutral loci.

| run set          | A            | B            | C            | D            | E            | F            | G            | H            | I            |
|------------------|--------------|--------------|--------------|--------------|--------------|--------------|--------------|--------------|--------------|
| s                | 0.005        | 0.01         | 0.02         | 0.005        | 0.01         | 0.02         | 0.02         | 0.02         | 0.02         |
| m                | 0.01         | 0.01         | 0.01         | 0.1          | 0.1          | 0.1          | 0.00002      | 0.0001       | 0.0002       |
| a selected       | 5.6098       | 3.9289       | 3.1885       | 1.5041       | 21.4833      | 9.2014       | 2.445        | 2.4584       | 2.4417       |
| b selected       | -0.6312      | -0.6862      | -0.6405      | 1.5251       | -0.2158      | -0.2409      | -1.048       | -1.0429      | -1.0585      |
| a neutral        | 3.8938       | 2.8471       | 2.3875       | 0.06         | 3.8226       | 2.6796       | 2.2129       | 2.1761       | 2.1855       |
| b neutral        | 0.0141       | 0.3384       | 0.852        | 86.258       | 0.3645       | 0.7493       | 0.6911       | 0.6785       | 0.6930       |
| p value          | $< 2e^{-16}$ | $< 2e^{-16}$ | $< 2e^{-16}$ | $< 2e^{-16}$ | $< 2e^{-16}$ | $< 2e^{-16}$ | $< 2e^{-16}$ | $< 2e^{-16}$ | $< 2e^{-16}$ |
| p value          | $< 2e^{-16}$ | $< 2e^{-16}$ | $< 2e^{-16}$ | $< 2e^{-16}$ | $< 2e^{-16}$ | $< 2e^{-16}$ | $< 2e^{-16}$ | $< 2e^{-16}$ | $< 2e^{-16}$ |
| s res. std. err. | 0.0243       | 0.0231       | 0.0316       | 0.003        | 0.0557       | 0.055        | 0.0325       | 0.0344       | 0.0347       |
| n res. std. err. | 0.0302       | 0.0294       | 0.026        | 0.00059      | 0.0355       | 0.031        | 0.0288       | 0.0252       | 0.0259       |
| df               | 30975        | 7756         | 11620        | 74948        | 16696        | 6321         | 1926         | 1595         | 1558         |

Table S3: Summary for nonlinear least squares fit of average LD for selected and neutral loci. Run D did not yield intelligible results and was excluded here.

| run set          | A            | B            | C            | D     | E            | F            | G            | H            | I            |
|------------------|--------------|--------------|--------------|-------|--------------|--------------|--------------|--------------|--------------|
| s                | 0.05         | 0.01         | 0.02         | 0.005 | 0.01         | 0.02         | 0.02         | 0.02         | 0.02         |
| m                | 0.01         | 0.01         | 0.01         | 0.1   | 0.1          | 0.1          | 0.00002      | 0.0001       | 0.0002       |
| z selected       | 0.962        | 0.935        | 0.905        | –     | 0.948        | 0.918        | 0.9368       | 0.9162       | 0.9011       |
| a selected       | 0.0614       | 0.1835       | 0.076        | –     | 0.213        | 0.273        | 0.303        | 0.3455       | 0.3714       |
| b selected       | 81.12        | 16.927       | 28.774       | –     | 161.3        | 37.05        | 3.6779       | 3.6146       | 3.3015       |
| z neutral        | 0.729        | 0.463        | 0.1892       | –     | 0.508        | 0.245        | 0.2635       | 0.2019       | 0.1496       |
| a neutral        | 0.0147       | 0.0361       | 0.0167       | –     | 0.0314       | 0.0406       | 0.0724       | 0.0949       | 0.12         |
| b neutral        | 231.6        | 80.5         | 166          | –     | 234.6        | 90.06        | 35.1148      | 26.5898      | 21.025       |
| p value          | $< 2e^{-16}$ | $< 2e^{-16}$ | $< 2e^{-16}$ | –     | $< 2e^{-16}$ | $< 2e^{-16}$ | $< 2e^{-16}$ | $< 2e^{-16}$ | $< 2e^{-16}$ |
| p value          | $< 2e^{-16}$ | $< 2e^{-16}$ | $< 2e^{-16}$ | –     | $< 2e^{-16}$ | $< 2e^{-16}$ | $< 2e^{-16}$ | $< 2e^{-16}$ | $< 2e^{-16}$ |
| s res. std. err. | 0.0208       | 0.03326      | 0.0428       | –     | 0.035        | 0.039        | 0.0392       | 0.0366       | 0.0417       |
| n res. std. err. | 0.0312       | 0.016        | 0.0063       | –     | 0.015        | 0.0095       | 0.0146       | 0.0066       | 0.0042       |
| df               | 664          | 167          | 289          | –     | 401          | 151          | 66           | 46           | 35           |

Table S4: Numbers of scaffolds and variants for each included *Heliconius* chromosome.

| Chromosome | no. scaffolds | no. variants |
|------------|---------------|--------------|
| 2          | 1             | 449,499      |
| 7          | 1             | 667,749      |
| 10         | 1             | 850,334      |
| 18         | 3             | 771,594      |
| 21 (Z)     | 1             | 523,014      |

Table S5: Population genetic statistics for *Heliconius* species per chromosome.

| species             | chromosome | $\pi$ (sd)  | Tajimas D (sd) |
|---------------------|------------|-------------|----------------|
| <i>c. galanthus</i> | 2          | 0.24 (0.06) | 0.66 (0.60)    |
| <i>c. galanthus</i> | 7          | 0.23 (0.06) | 0.59 (0.63)    |
| <i>c. galanthus</i> | 10         | 0.23 (0.06) | 0.63 (0.62)    |
| <i>c. galanthus</i> | 18         | 0.23 (0.06) | 0.63 (0.61)    |
| <i>c. galanthus</i> | 21         | 0.21 (0.06) | 0.70 (0.66)    |
| <i>m. rosina</i>    | 2          | 0.22 (0.07) | 0.87 (0.76)    |
| <i>m. rosina</i>    | 7          | 0.24 (0.07) | 0.73 (0.88)    |
| <i>m. rosina</i>    | 10         | 0.23 (0.08) | 0.84 (0.88)    |
| <i>m. rosina</i>    | 18         | 0.23 (0.08) | 0.86 (0.85)    |
| <i>m. rosina</i>    | 21         | 0.13 (0.07) | 0.89 (0.92)    |
| <i>pachinus</i>     | 2          | 0.22 (0.06) | 0.83 (0.67)    |
| <i>pachinus</i>     | 7          | 0.21 (0.07) | 0.72 (0.75)    |
| <i>pachinus</i>     | 10         | 0.20 (0.07) | 0.73 (0.77)    |
| <i>pachinus</i>     | 18         | 0.20 (0.07) | 0.74 (0.75)    |
| <i>pachinus</i>     | 21         | 0.18 (0.07) | 0.81 (0.77)    |

Table S6: Population genetic statistics for *Heliconius* species pairs per chromosome

| species pair                           | chromosome | $F_{ST}$ (sd) | dxy (sd)    | no. outliers<br>(AFDs & $F_{ST}$ ,<br>resp.) | 99% quant.<br>AFDs | 99% quant.<br>$F_{ST}$ |
|----------------------------------------|------------|---------------|-------------|----------------------------------------------|--------------------|------------------------|
| <i>c. galanthus</i> - <i>m. rosina</i> | 2          | 0.23 (0.25)   | 0.37 (0.09) | 4495                                         | 0.9484             | 0.9513                 |
| <i>c. galanthus</i> - <i>m. rosina</i> | 7          | 0.22 (0.25)   | 0.37 (0.10) | 6677                                         | 0.9274             | 0.9499                 |
| <i>c. galanthus</i> - <i>m. rosina</i> | 10         | 0.25 (0.26)   | 0.38 (0.09) | 8503                                         | 0.9495             | 0.95                   |
| <i>c. galanthus</i> - <i>m. rosina</i> | 18         | 0.25 (0.27)   | 0.38 (0.10) | 7716                                         | 0.9967             | 0.9912                 |
| <i>c. galanthus</i> - <i>m. rosina</i> | 21         | 0.39 (0.33)   | 0.46 (0.11) | 5230                                         | 0.9963             | 0.9963                 |
| <i>pachinus</i> - <i>m. rosina</i>     | 2          | 0.27 (0.27)   | 0.38 (0.09) | 4495                                         | 0.9848             | 0.9907                 |
| <i>pachinus</i> - <i>m. rosina</i>     | 7          | 0.27 (0.27)   | 0.39 (0.10) | 6677                                         | 0.9573             | 0.9677                 |
| <i>pachinus</i> - <i>m. rosina</i>     | 10         | 0.30 (0.28)   | 0.40 (0.10) | 8503                                         | 0.9912             | 0.9933                 |
| <i>pachinus</i> - <i>m. rosina</i>     | 18         | 0.29 (0.28)   | 0.40 (0.11) | 7716                                         | 0.9967             | 0.9981                 |
| <i>pachinus</i> - <i>m. rosina</i>     | 21         | 0.44 (0.35)   | 0.48 (0.12) | 5230                                         | 0.9963             | 0.998                  |
| <i>c. galanthus</i> - <i>pachinus</i>  | 2          | 0.09 (0.13)   | 0.26 (0.06) | 4495                                         | 0.4152             | 0.4399                 |
| <i>c. galanthus</i> - <i>pachinus</i>  | 7          | 0.08 (0.13)   | 0.25 (0.06) | 6677                                         | 0.3999             | 0.4112                 |
| <i>c. galanthus</i> - <i>pachinus</i>  | 10         | 0.09 (0.14)   | 0.24 (0.06) | 8503                                         | 0.4233             | 0.4188                 |
| <i>c. galanthus</i> - <i>pachinus</i>  | 18         | 0.09 (0.13)   | 0.24 (0.06) | 7716                                         | 0.4019             | 0.422                  |
| <i>c. galanthus</i> - <i>pachinus</i>  | 21         | 0.10 (0.15)   | 0.23 (0.06) | 5230                                         | 0.4544             | 0.4495                 |

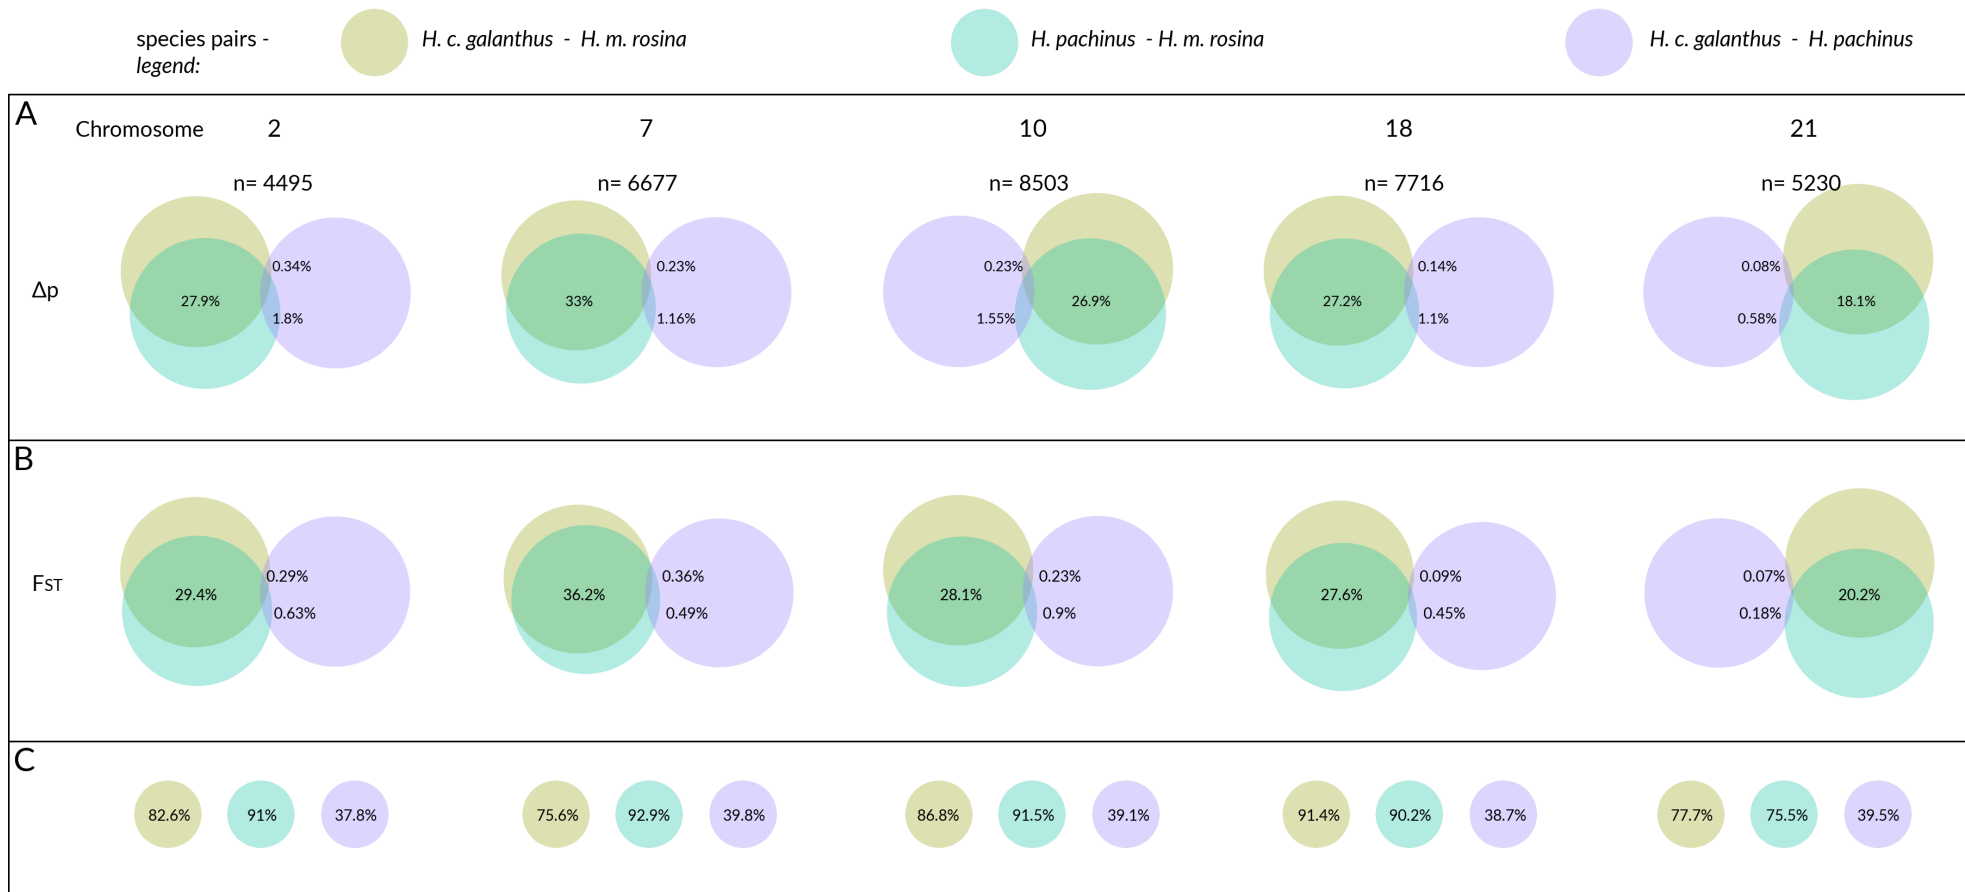

Figure S1: Venn diagrams to illustrate the overlap of outliers for A) AFDs and B)  $F_{ST}$  and all species pairs and chromosomes. Percentage of overlap is shown for respective pairs of taxa. C) Percentage of overlap between AFD and  $F_{ST}$  species pairs and chromosomes. This is not a Venn diagram, but simply shows the percentage between two sets in the circle.

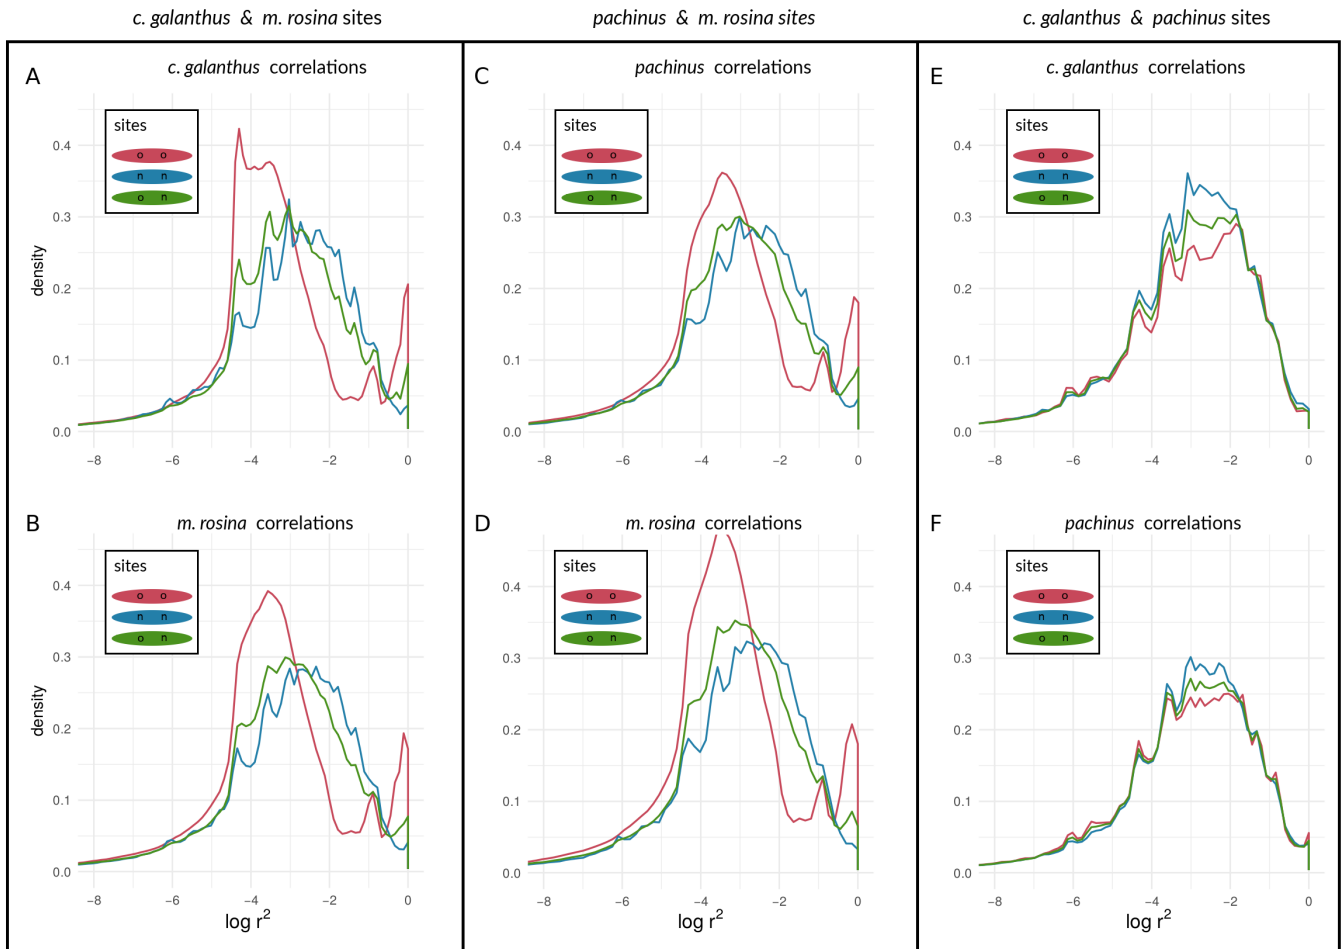

Figure S2: Density curves of within-species LD for loci at different types of sites **on chromosome 7**, determined by  $F_{ST}$  outliers.  $\log r^2$  values are shown between outliers, between non-outliers and between outliers and non-outliers for species pairs of *H. cydno galanthus* and *H. melpomene rosina* (A & B), *H. pachinus* and *H. melpomene rosina* (C & D), and *H. cydno galanthus* and *H. pachinus* (E & F).

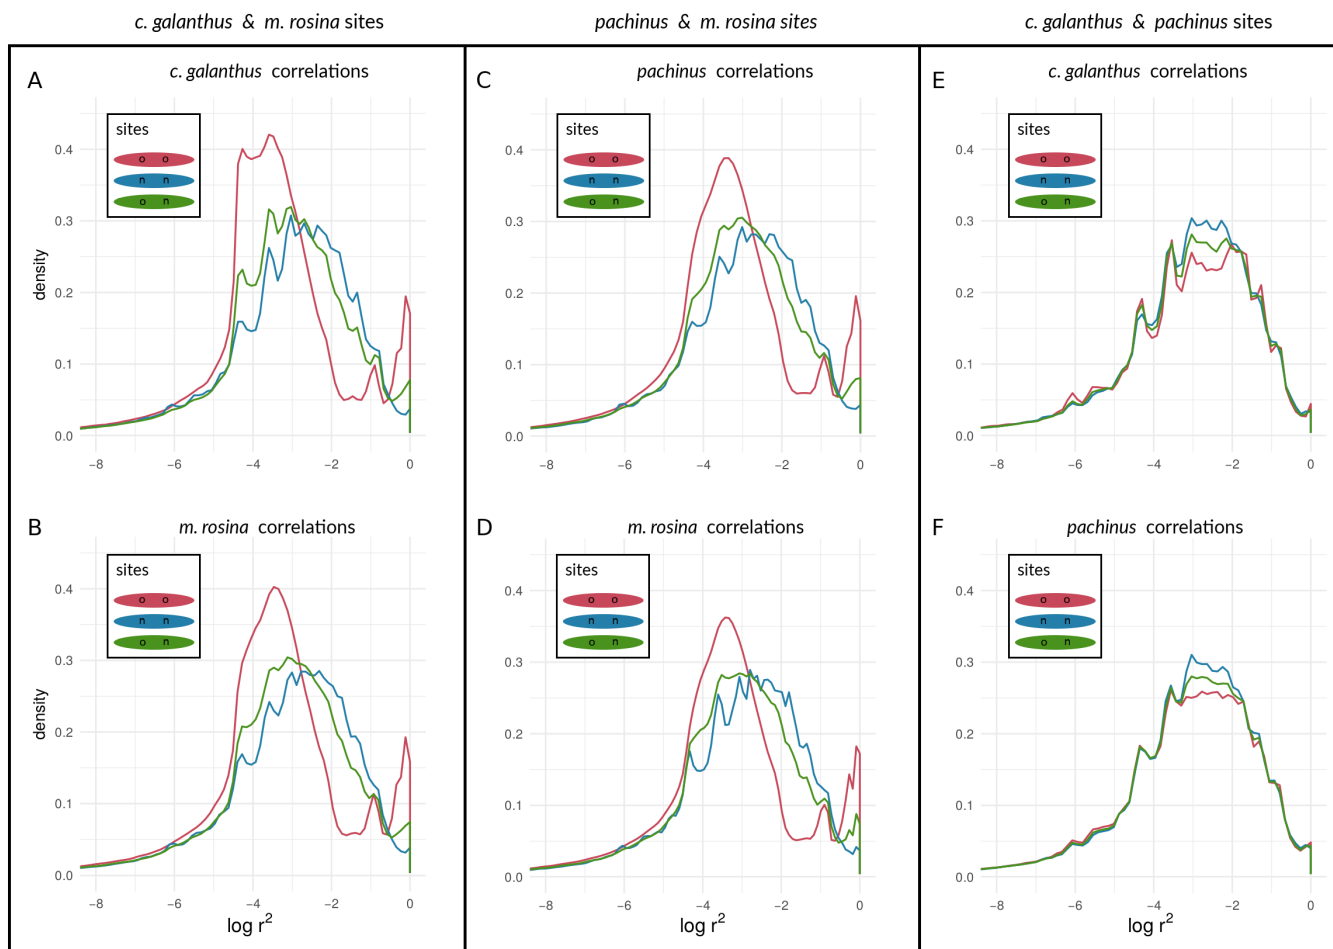

Figure S3: Density curves of within-species LD for loci at different types of sites **on chromosome 10**, determined by  $F_{ST}$  outliers.  $\log r^2$  values are shown between outliers, between non-outliers and between outliers and non-outliers for species pairs of *H. cydno galanthus* and *H. melpomene rosina* (A & B), *H. pachinus* and *H. melpomene rosina* (C & D), and *H. cydno galanthus* and *H. pachinus* (E & F).



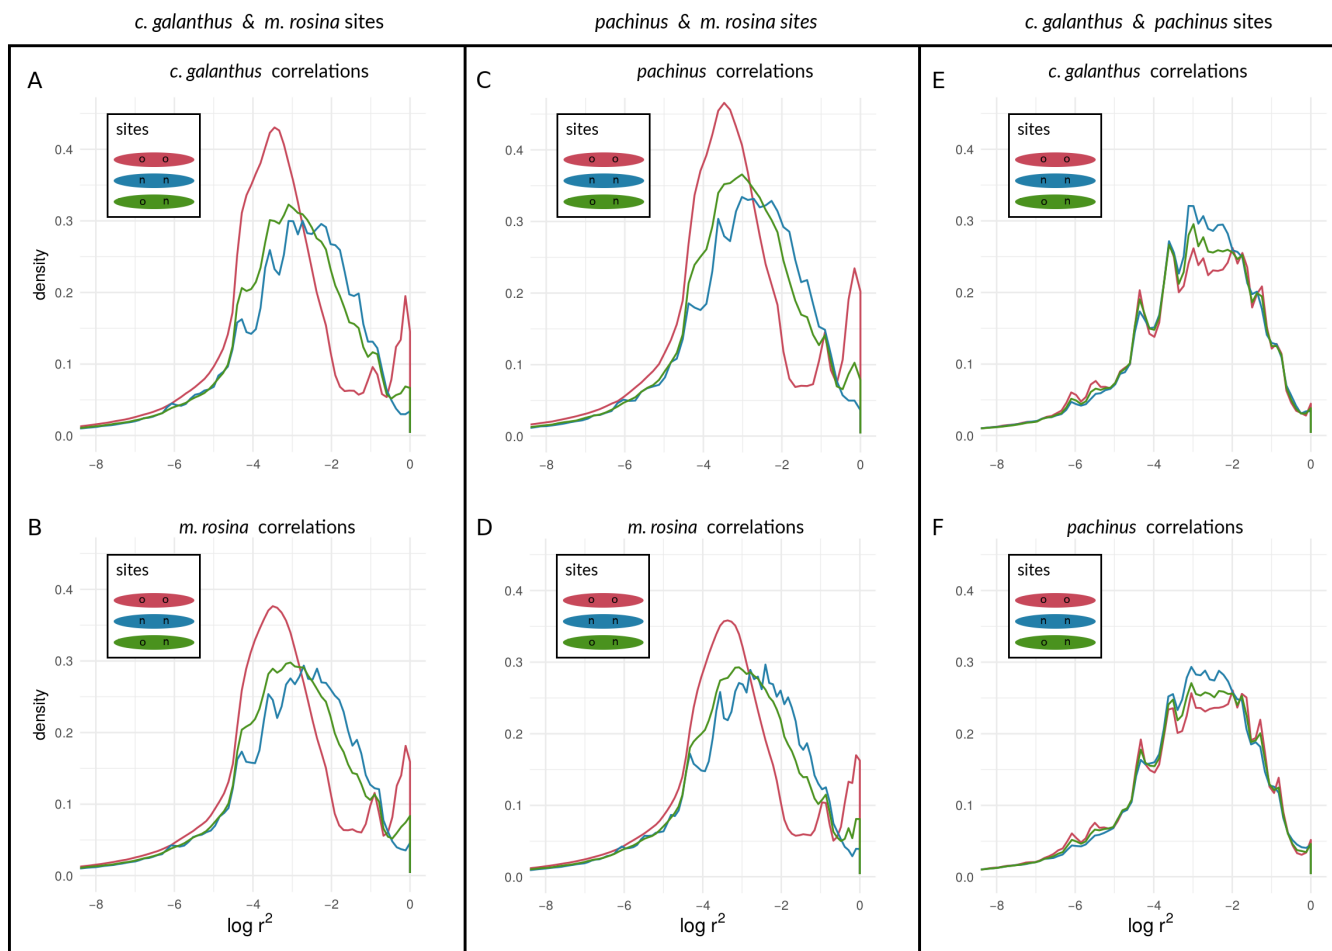

Figure S4: Density curves of within-species LD for loci at different types of sites **on chromosome 18**, determined by  $F_{ST}$  outliers.  $\log r^2$  values are shown between outliers, between non-outliers and between outliers and non-outliers for species pairs of *H. cydno galanthus* and *H. melpomene rosina* (A & B), *H. pachinus* and *H. melpomene rosina* (C & D), and *H. cydno galanthus* and *H. pachinus* (E & F).

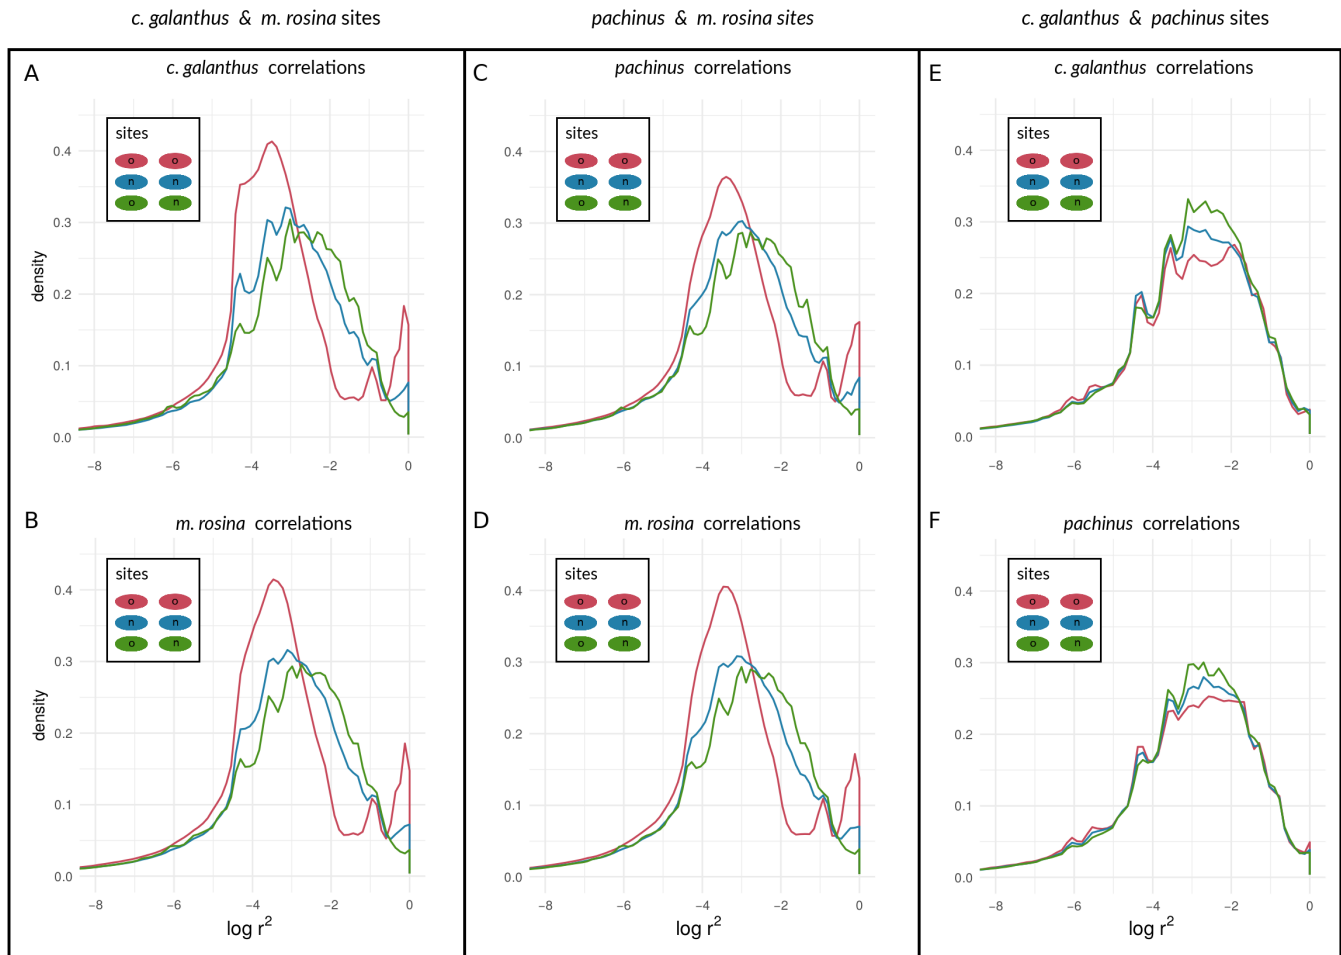

Figure S5: Density curves of within-species LD for loci at different types of sites **on chromosome 2 and respective sites on all other chromosomes**, determined by  $F_{ST}$  outliers.  $\log r^2$  values are shown between outliers, between non-outliers and between outliers and non-outliers for species pairs of *H. cydno galanthus* and *H. melpomene rosina* (A & B), *H. pachinus* and *H. melpomene rosina* (C & D), and *H. cydno galanthus* and *H. pachinus* (E & F).

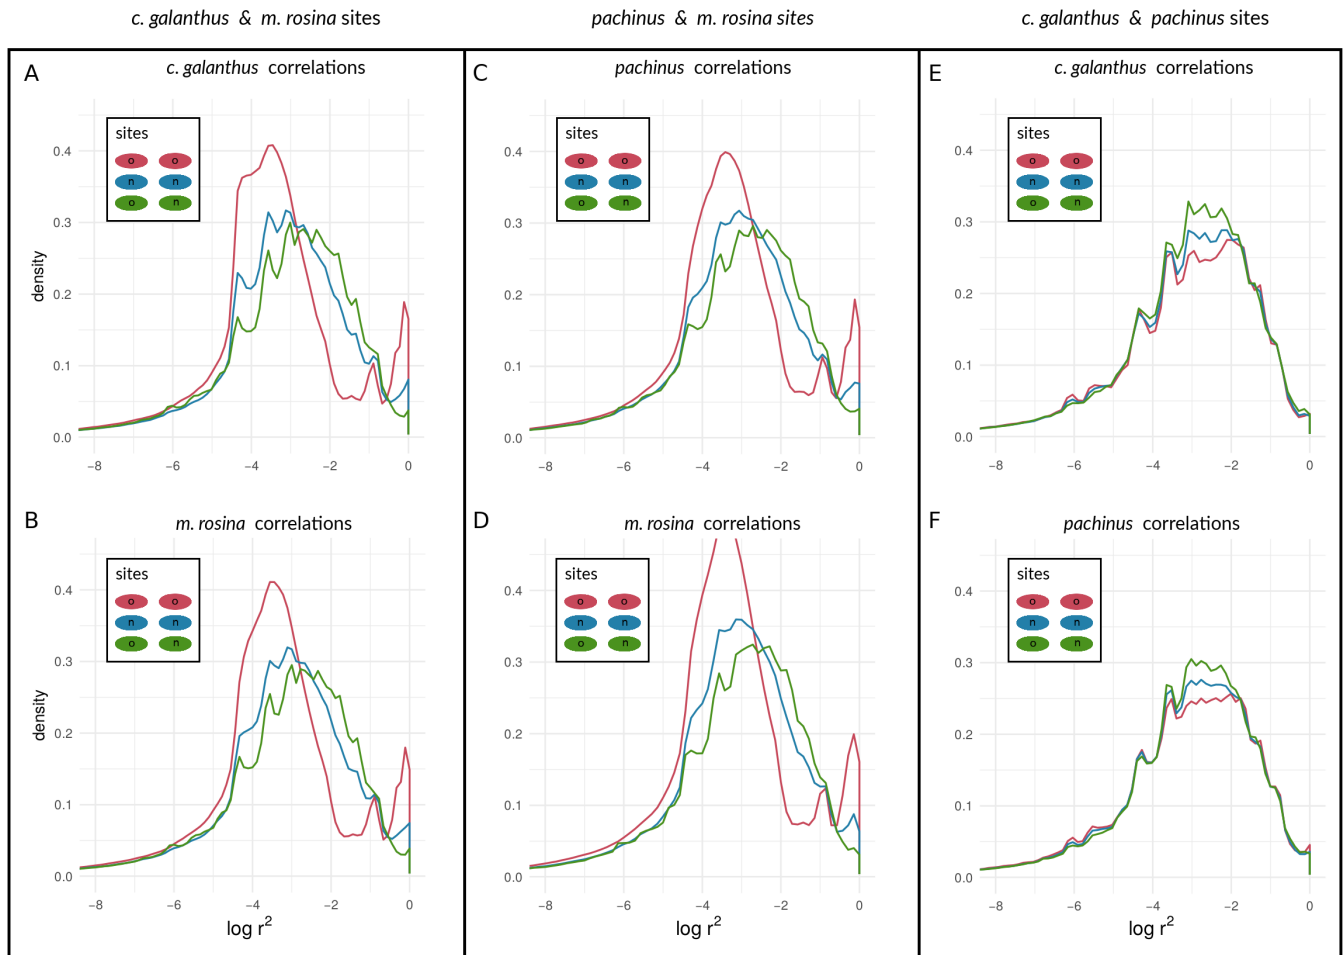

Figure S6: Density curves of within-species LD for loci at different types of sites **on chromosome 7 and respective sites on all other chromosomes**, determined by  $F_{ST}$  outliers.  $\log r^2$  values are shown between outliers, between non-outliers and between outliers and non-outliers for species pairs of *H. cydno galanthus* and *H. melpomene rosina* (A & B), *H. pachinus* and *H. melpomene rosina* (C & D), and *H. cydno galanthus* and *H. pachinus* (E & F).

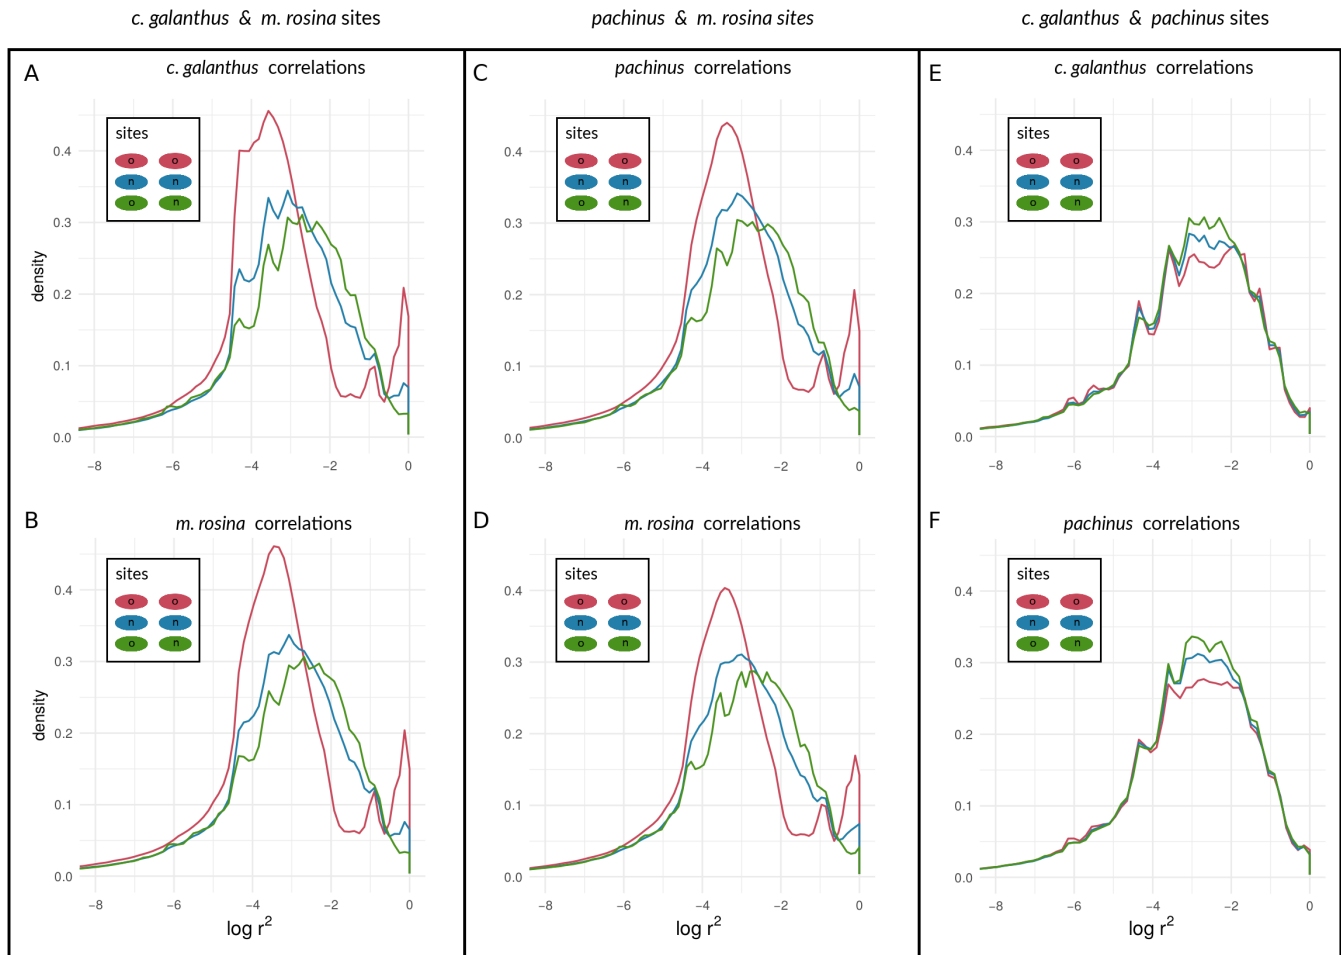

Figure S7: Density curves of within-species LD for loci at different types of sites **on chromosome 10 and respective sites on all other chromosomes**, determined by  $F_{ST}$  outliers.  $\log r^2$  values are shown between outliers, between non-outliers and between outliers and non-outliers for species pairs of *H. cydno galanthus* and *H. melpomene rosina* (A & B), *H. pachinus* and *H. melpomene rosina* (C & D), and *H. cydno galanthus* and *H. pachinus* (E & F).

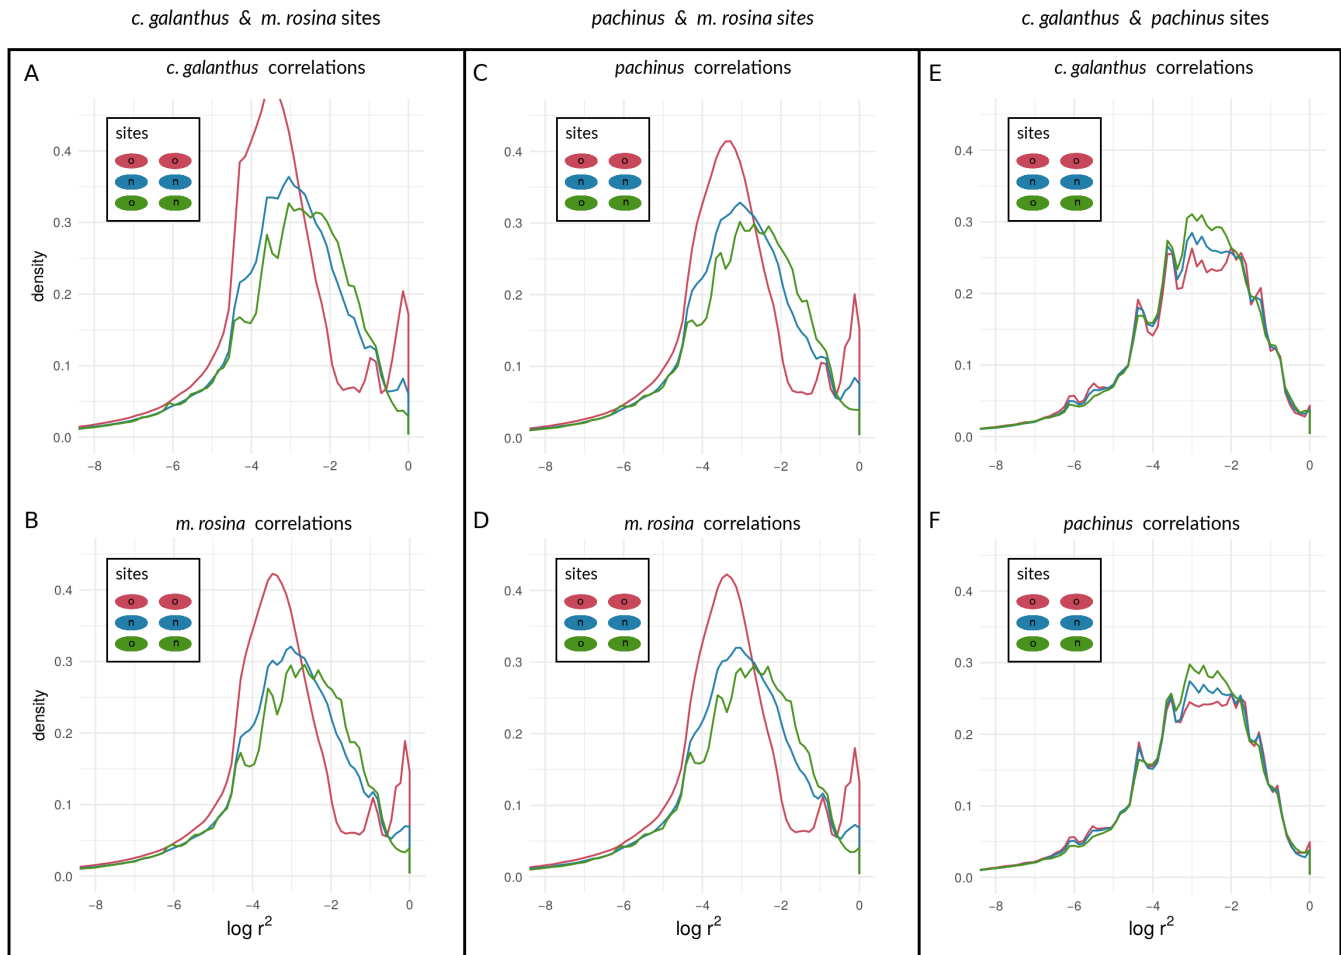

Figure S8: Density curves of within-species LD for loci at different types of sites **on chromosome 18 and respective sites on all other chromosomes**, determined by  $F_{ST}$  outliers.  $\log r^2$  values are shown between outliers, between non-outliers and between outliers and non-outliers for species pairs of *H. cydno galanthus* and *H. melpomene rosina* (A & B), *H. pachinus* and *H. melpomene rosina* (C & D), and *H. cydno galanthus* and *H. pachinus* (E & F).

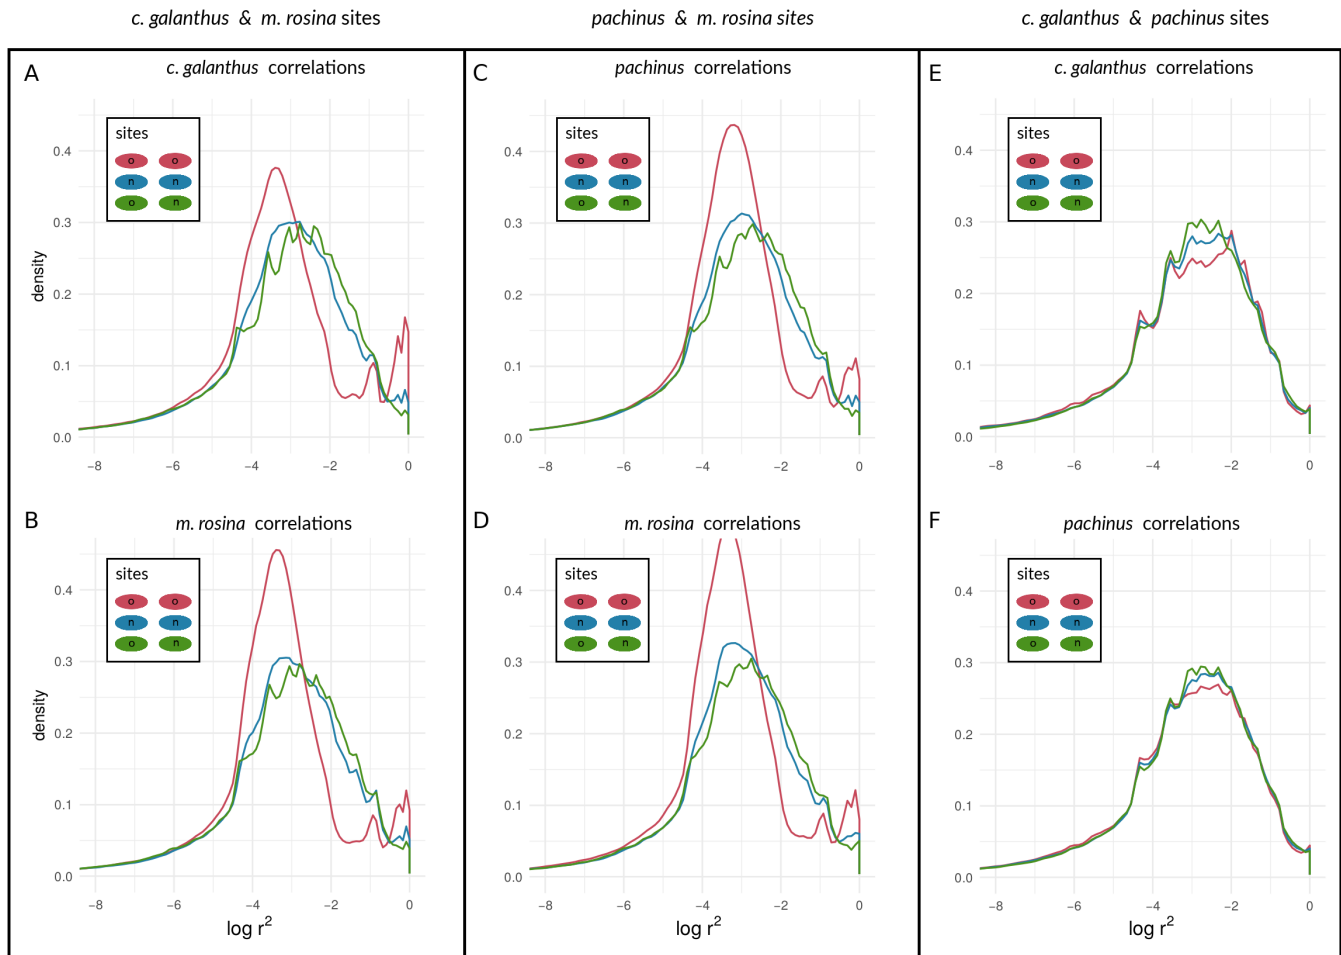

Figure S9: Density curves of within-species LD for loci at different types of sites **on chromosome 21 and respective sites on all other chromosomes**, determined by  $F_{ST}$  outliers.  $\log r^2$  values are shown between outliers, between non-outliers and between outliers and non-outliers for species pairs of *H. cydno galanthus* and *H. melpomene rosina* (A & B), *H. pachinus* and *H. melpomene rosina* (C & D), and *H. cydno galanthus* and *H. pachinus* (E & F).

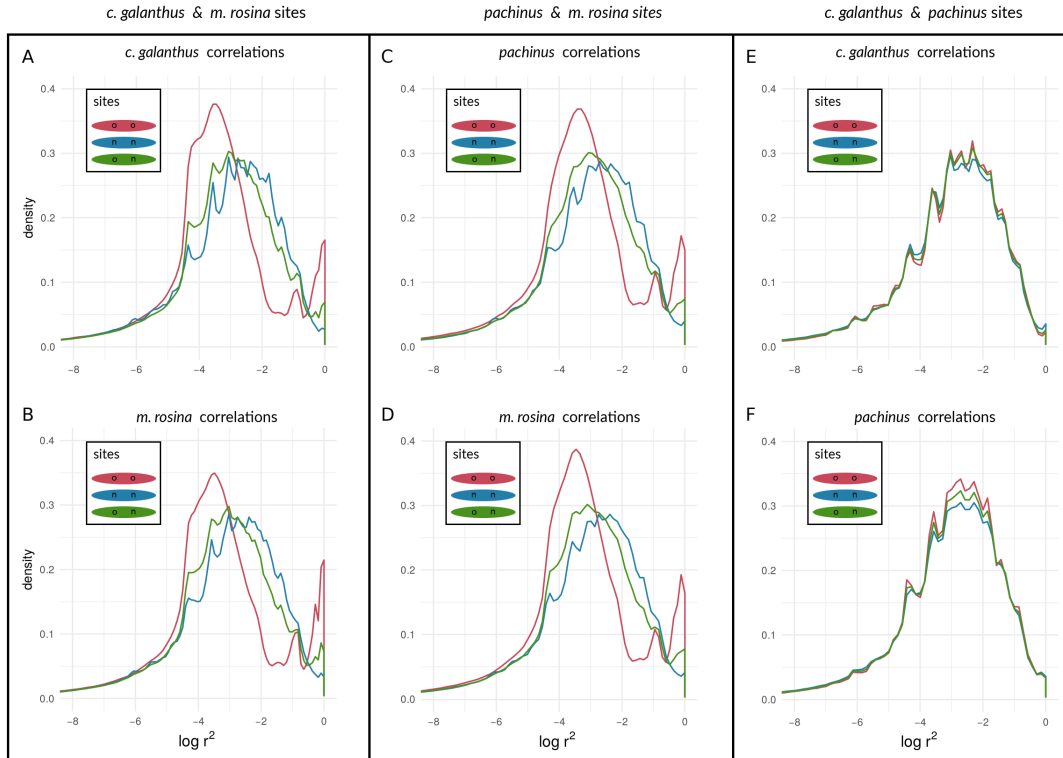

Figure S10: Density curves of within-species linkage disequilibrium for loci at different types of sites (o: outliers; n: non-outliers) on chromosome 2 (representative of autosomes), determined by outliers of allele frequency differences.  $\log(r^2)$  values are shown between outliers, between non-outliers, and between outliers and non-outliers for species pairs of *H. cydno galanthus* and *H. melpomene rosina* (A & B), *H. pachinus* and *H. melpomene rosina* (C & D), and *H. cydno galanthus* and *H. pachinus* (E & F).

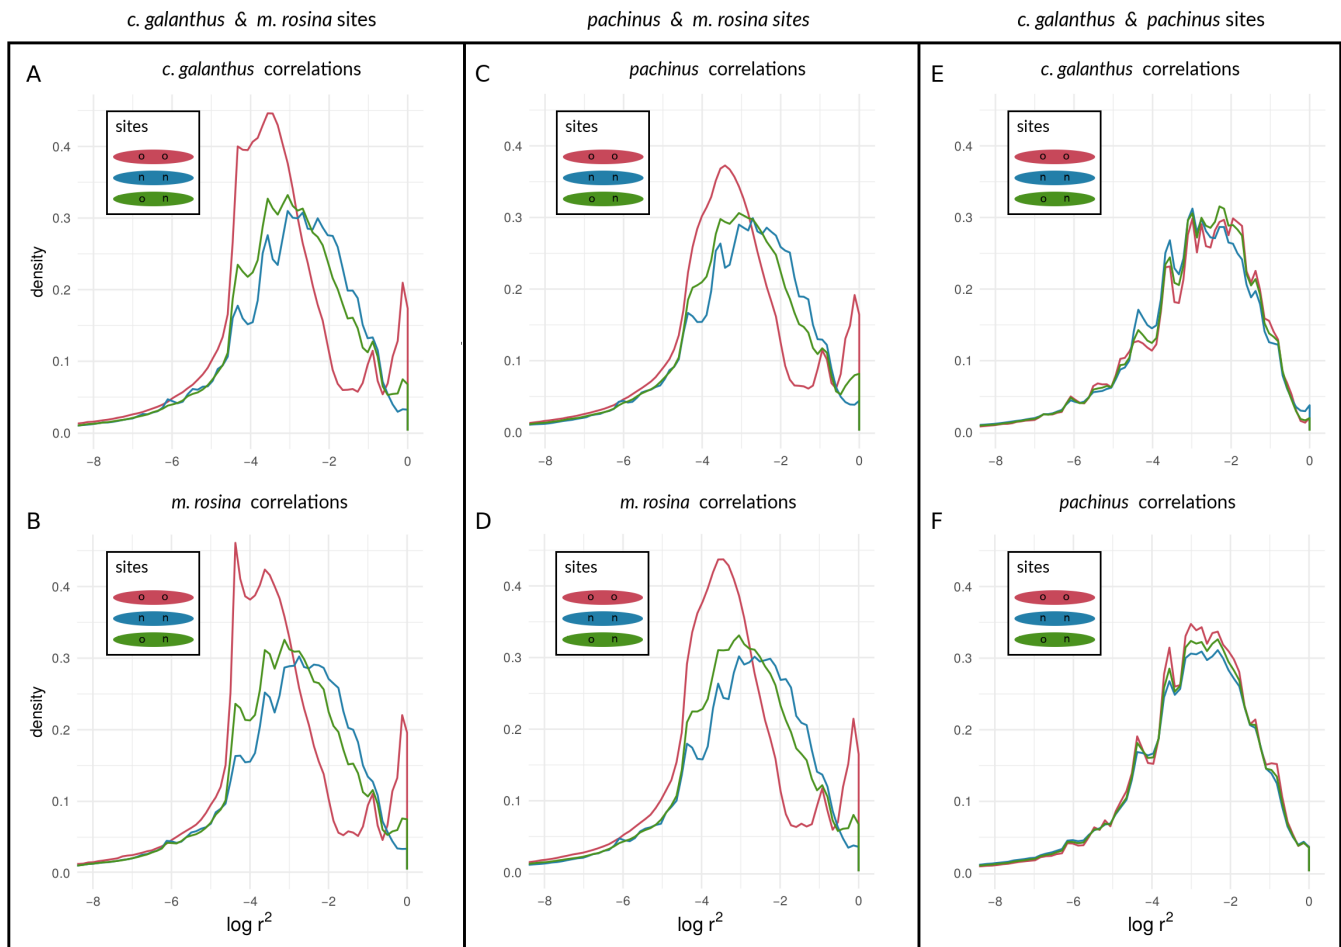

Figure S11: Density curves of within-species LD for loci at different types of sites **on chromosome 7**, determined by outliers of **AFDs**.  $\log r^2$  values are shown between outliers, between non-outliers and between outliers and non-outliers for species pairs of *H. cydno galanthus* and *H. melpomene rosina* (A & B), *H. pachinus* and *H. melpomene rosina* (C & D), and *H. cydno galanthus* and *H. pachinus* (E & F).



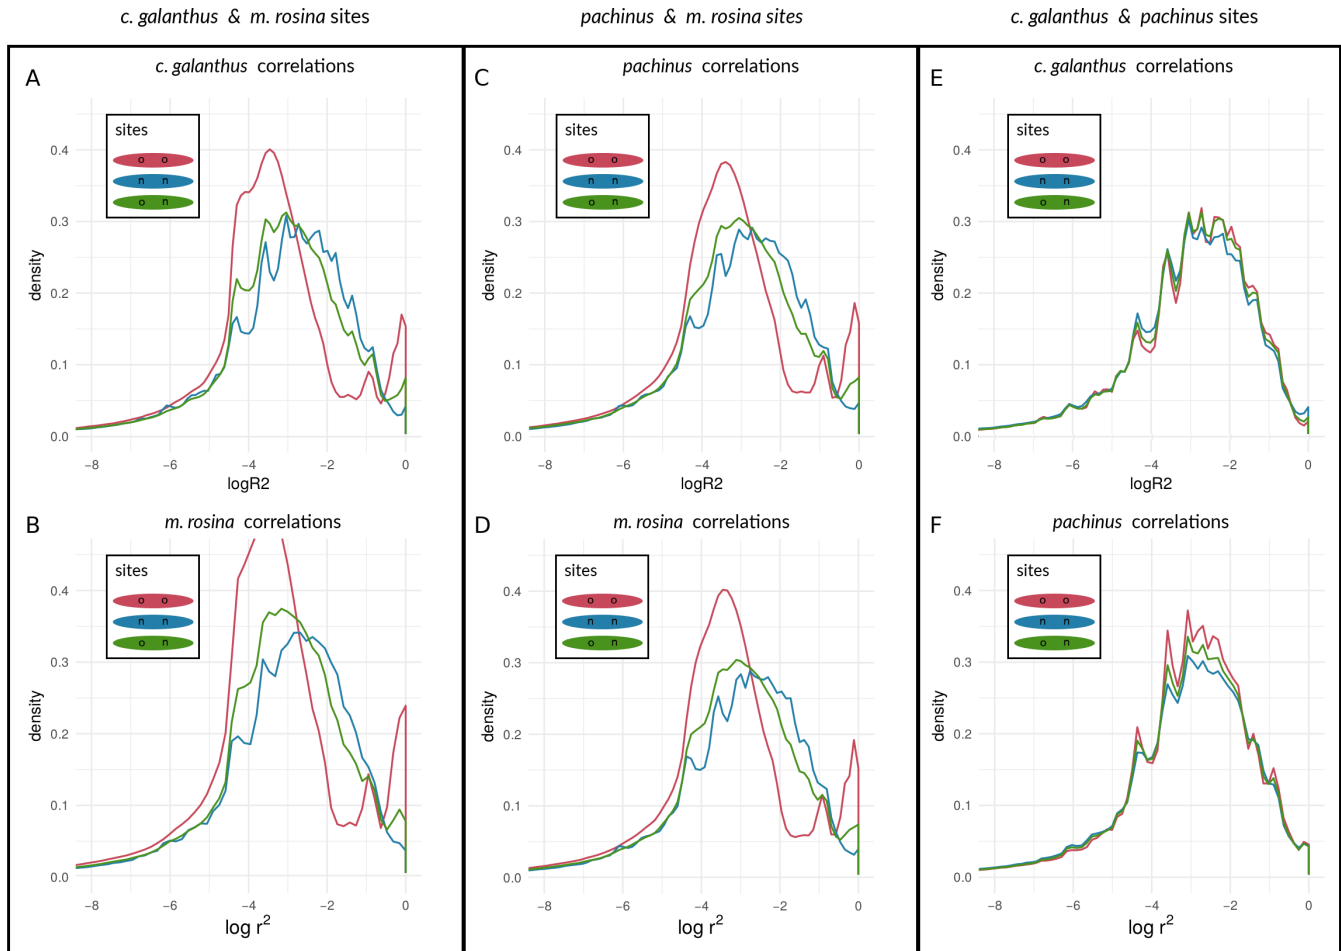

Figure S12: Density curves of within-species LD for loci at different types of sites **on chromosome 10**, determined by outliers of **AFDs**.  $\log r^2$  values are shown between outliers, between non-outliers and between outliers and non-outliers for species pairs of *H. cydno galanthus* and *H. melpomene rosina* (A & B), *H. pachinus* and *H. melpomene rosina* (C & D), and *H. cydno galanthus* and *H. pachinus* (E & F).

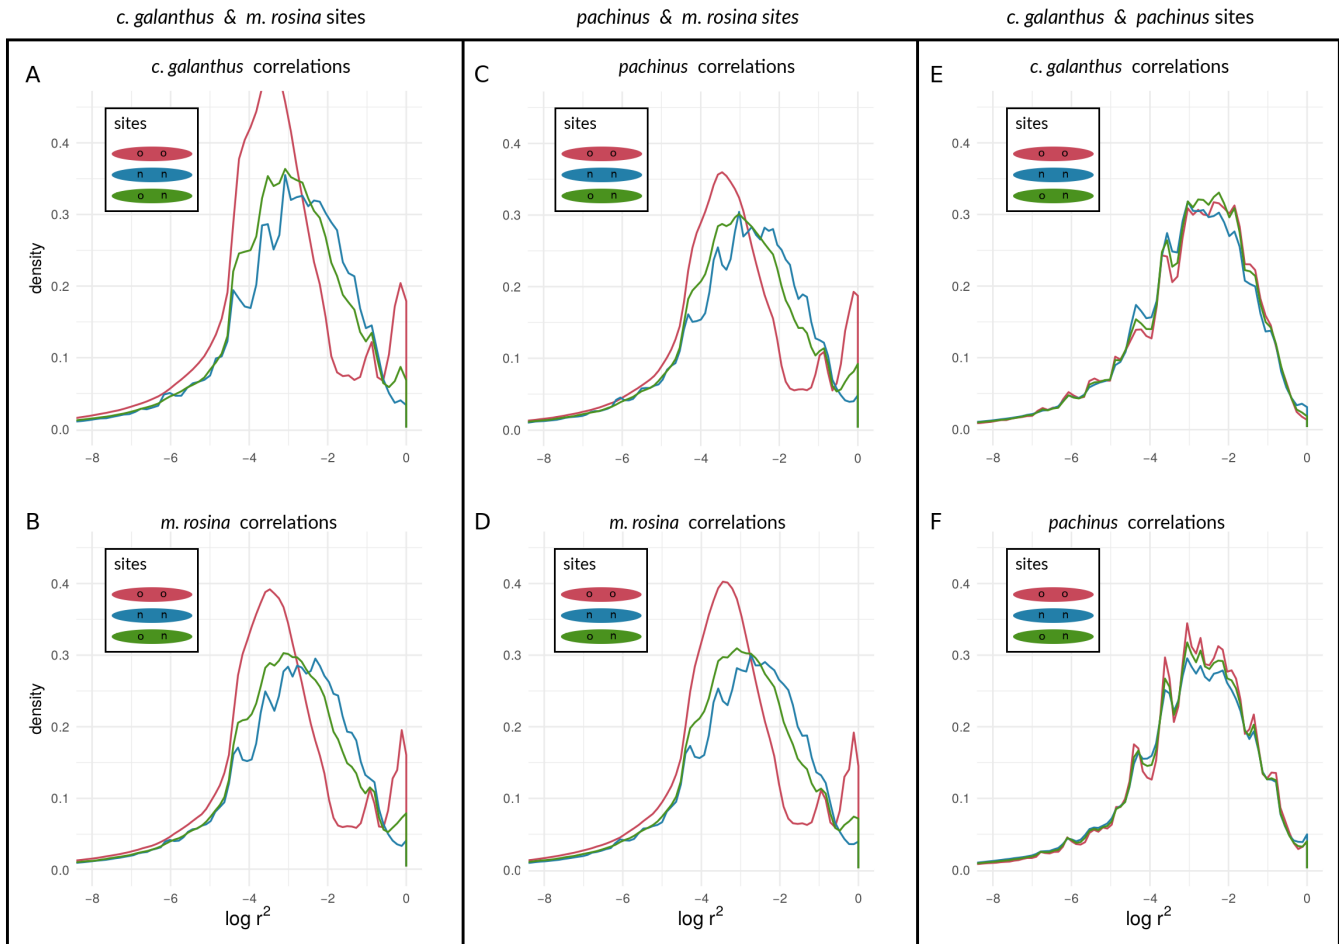

Figure S13: Density curves of within-species LD for loci at different types of sites on chromosome 18, determined by outliers of AFDs.  $\log r^2$  values are shown between outliers, between non-outliers and between outliers and non-outliers for species pairs of *H. cydno galanthus* and *H. melpomene rosina* (A & B), *H. pachinus* and *H. melpomene rosina* (C & D), and *H. cydno galanthus* and *H. pachinus* (E & F).

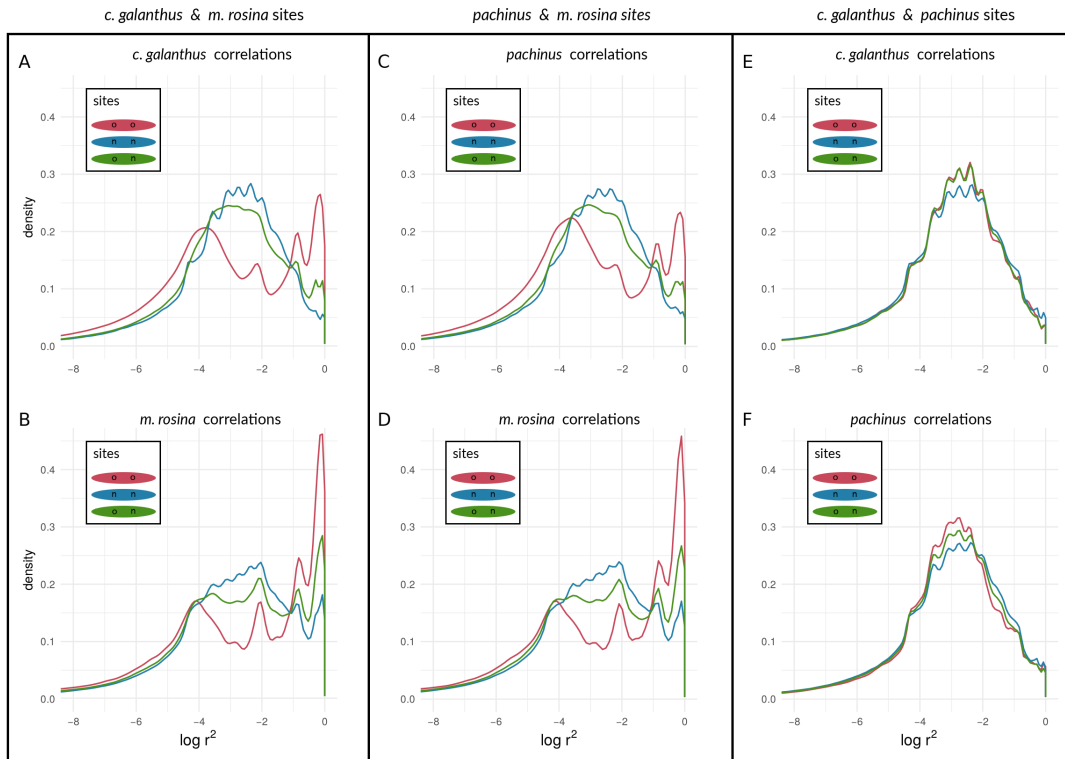

Figure S14: Density curves of within-species linkage disequilibrium for loci at different types of sites (o: outliers; n: non-outliers) on chromosome 21, determined by outliers of allele frequency differences.  $\log(r^2)$  values are shown between outliers, between non-outliers, and between outliers and non-outliers for species pairs of *H. cydno galanthus* and *H. melpomene rosina* (A & B), *H. pachinus* and *H. melpomene rosina* (C & D), and *H. cydno galanthus* and *H. pachinus* (E & F).

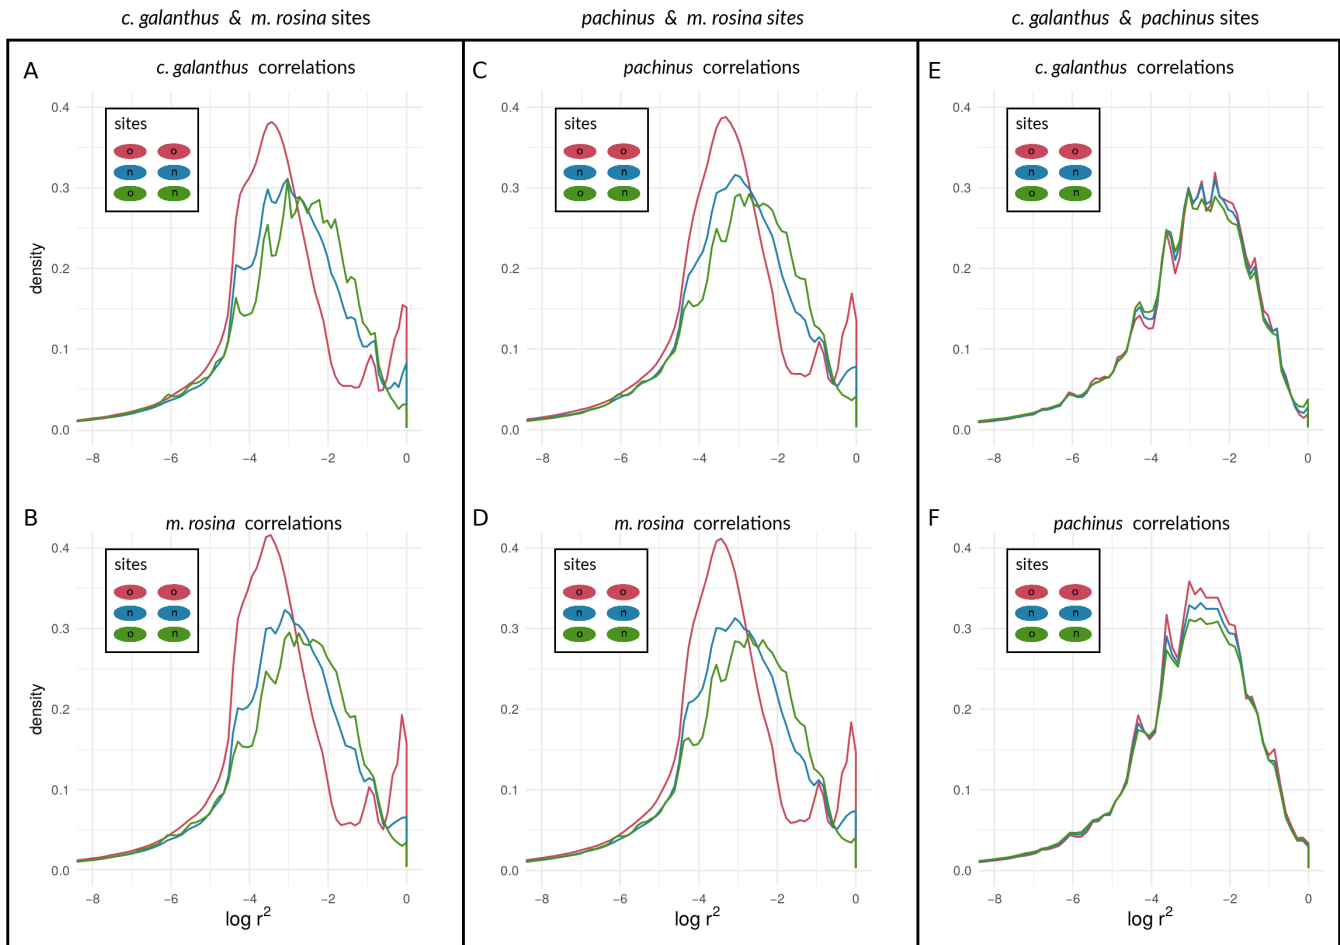

Figure S15: Density curves of within-species LD for loci at different types of sites **on chromosome 2 and respective sites on all other chromosomes**, determined by outliers of AFDs.  $\log r^2$  values are shown between outliers, between non-outliers and between outliers and non-outliers for species pairs of *H. cydno galanthus* and *H. melpomene rosina* (A & B), *H. pachinus* and *H. melpomene rosina* (C & D), and *H. cydno galanthus* and *H. pachinus* (E & F).

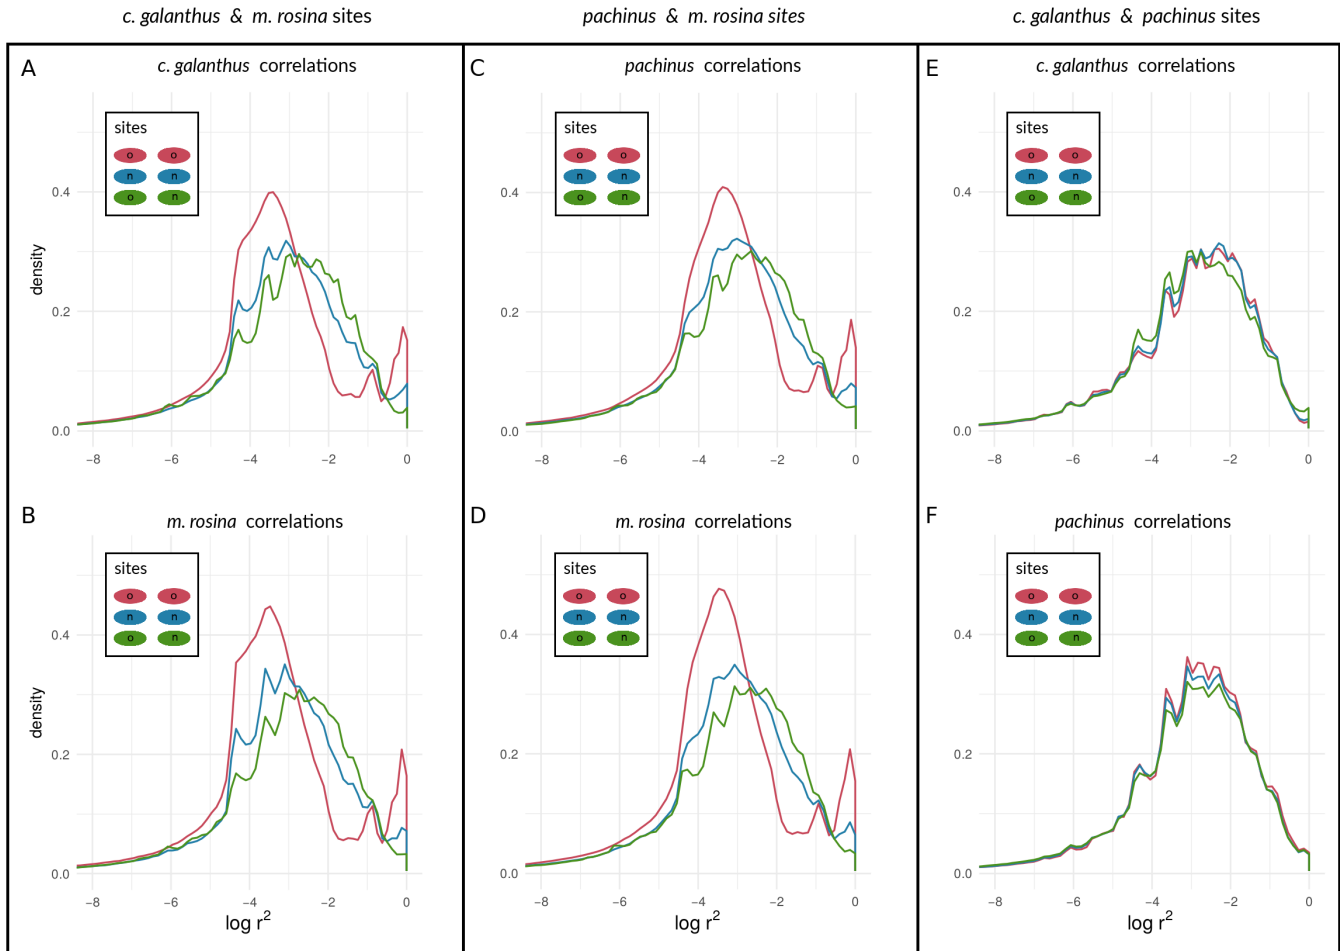

Figure S16: Density curves of within-species LD for loci at different types of sites **on chromosome 7 and respective sites on all other chromosomes**, determined by outliers of AFDs.  $\log r^2$  values are shown between outliers, between non-outliers and between outliers and non-outliers for species pairs of *H. cydno galanthus* and *H. melpomene rosina* (A & B), *H. pachinus* and *H. melpomene rosina* (C & D), and *H. cydno galanthus* and *H. pachinus* (E & F).

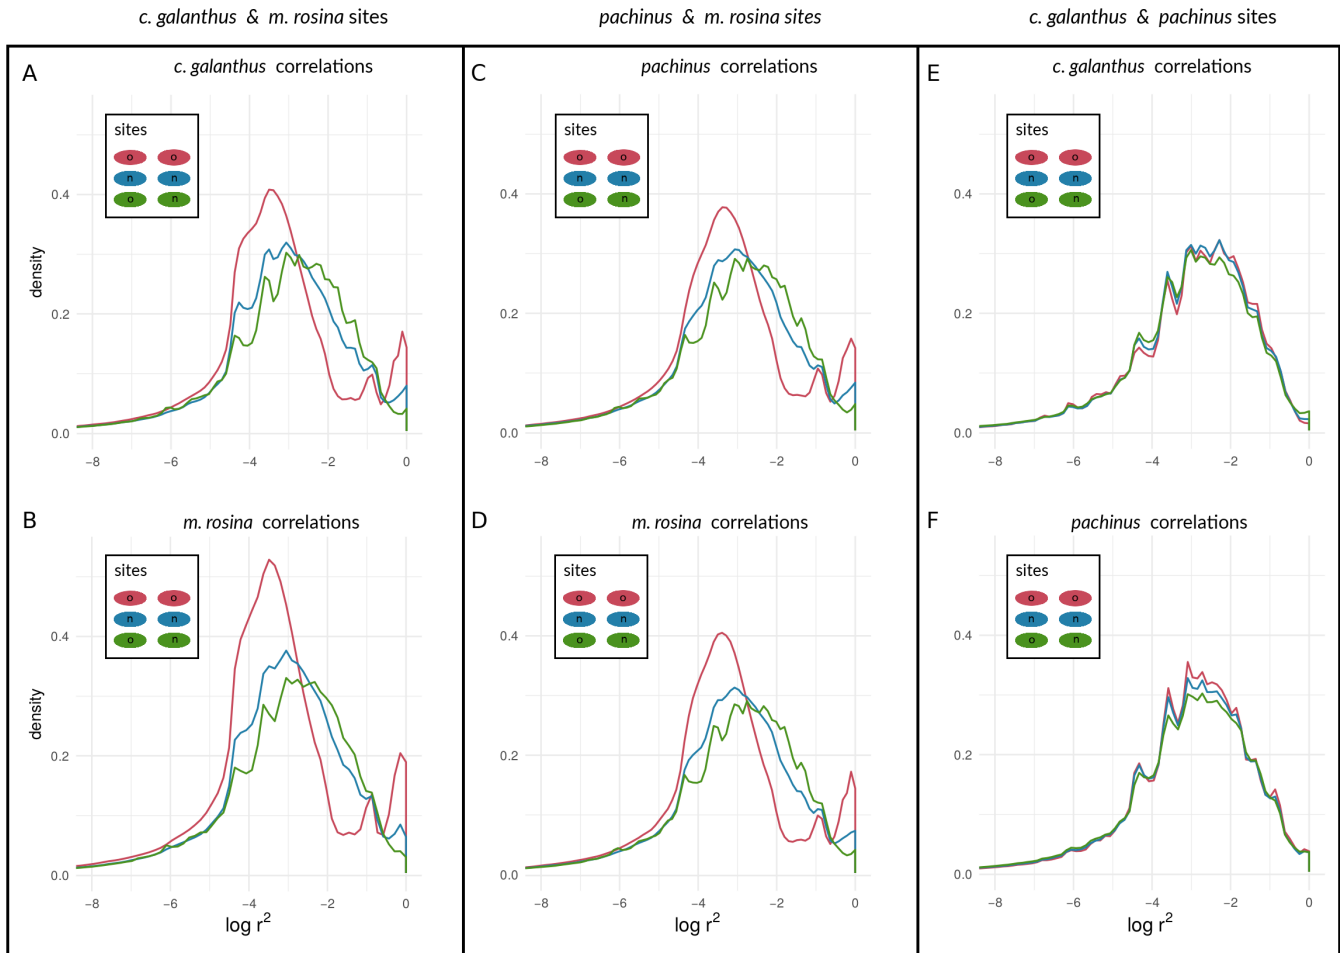

Figure S17: Density curves of within-species LD for loci at different types of sites **on chromosome 10 and respective sites on all other chromosomes**, determined by outliers of AFDs.  $\log r^2$  values are shown between outliers, between non-outliers and between outliers and non-outliers for species pairs of *H. cydno galanthus* and *H. melpomene rosina* (A & B), *H. pachinus* and *H. melpomene rosina* (C & D), and *H. cydno galanthus* and *H. pachinus* (E & F).

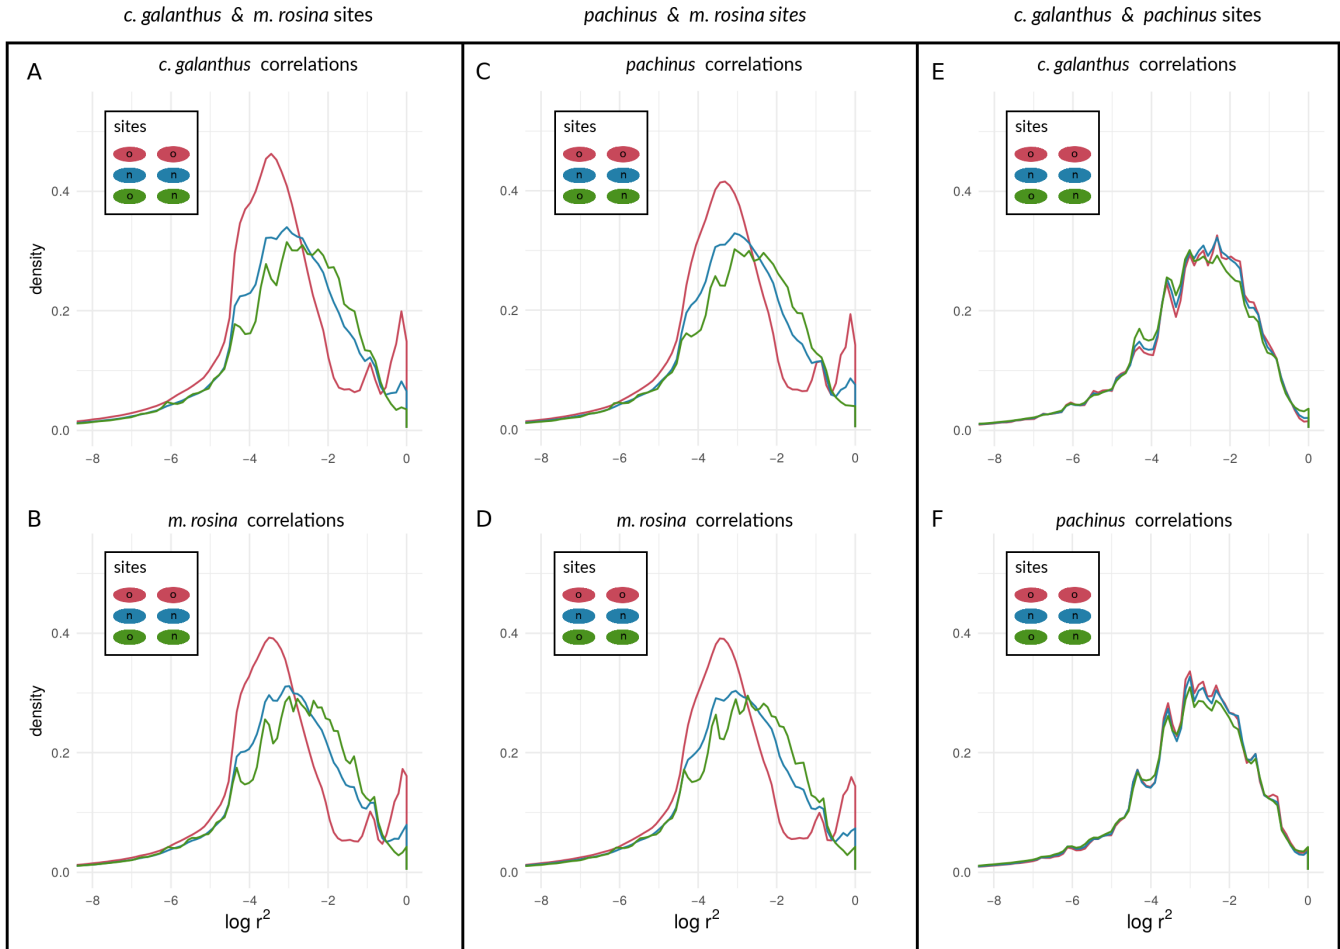

Figure S18: Density curves of within-species LD for loci at different types of sites **on chromosome 18 and respective sites on all other chromosomes**, determined by outliers of AFDs.  $\log r^2$  values are shown between outliers, between non-outliers and between outliers and non-outliers for species pairs of *H. cydno galanthus* and *H. melpomene rosina* (A & B), *H. pachinus* and *H. melpomene rosina* (C & D), and *H. cydno galanthus* and *H. pachinus* (E & F).

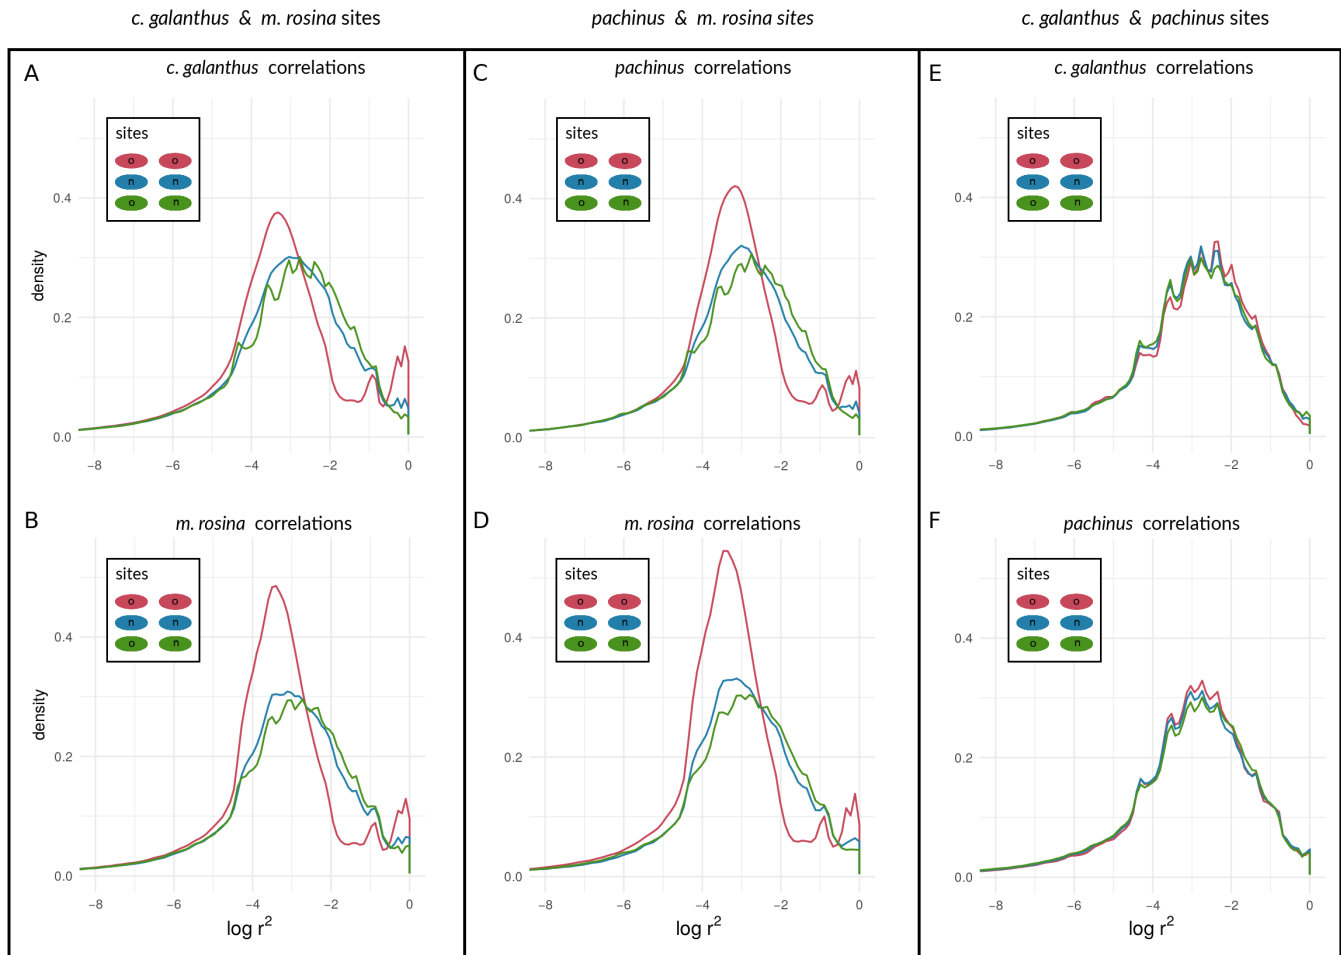

Figure S19: Density curves of within-species LD for loci at different types of sites **on chromosome 21 and respective sites on all other chromosomes**, determined by outliers of AFDs.  $\log r^2$  values are shown between outliers, between non-outliers and between outliers and non-outliers for species pairs of *H. cydno galanthus* and *H. melpomene rosina* (A & B), *H. pachinus* and *H. melpomene rosina* (C & D), and *H. cydno galanthus* and *H. pachinus* (E & F).
